# Supplementary material for: Similarity-Based Virtual Screening to Find Antituberculosis Agents Based on Novel Scaffolds: Design, Syntheses and Pharmacological Assays
Source: MDPI journal article supplement (doi:10.3390/ijms232315057), 2022-12-01

**Table S1.** Structures of the 32 compounds in the group of active substances.

| Name          | Structure                                                                            |
|---------------|--------------------------------------------------------------------------------------|
| Amikacin      | 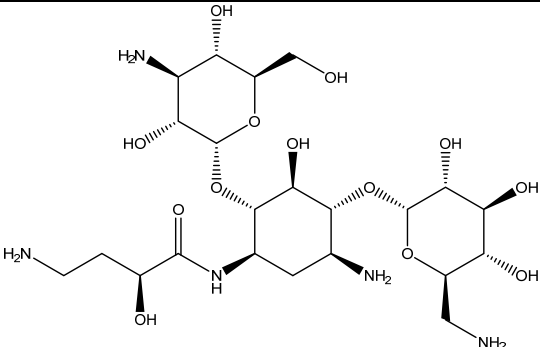   |
| Azithromycin  |   |
| Capreomycin   |  |
| Ciprofloxacin |  |

|                     |                                                                                      |
|---------------------|--------------------------------------------------------------------------------------|
| Clarithromycin      | 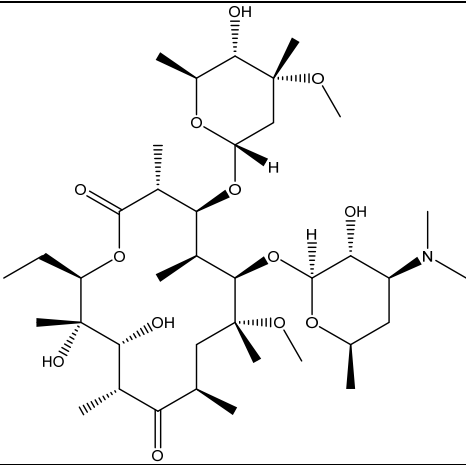   |
| Clofazimine         |    |
| Dihydrostreptomycin |   |
| Enviomycin          |  |
| Ethambutol          |  |
| Ethionamide         |  |

|                       |                                                                                      |
|-----------------------|--------------------------------------------------------------------------------------|
| Gatifloxacin          | 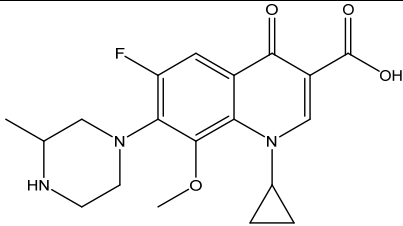   |
| Imipenem              |    |
| Isoniazid             |    |
| Kanamycin             |    |
| Morphazinamide        |   |
| Moxifloxacin          |  |
| Neomycin              |  |
| Ofloxacin             |  |
| p-aminosalicylic acid |  |



|                |                                                                                                                                                                                                                                                                                                                                                                                                                                                                                                                                                                                                  |
|----------------|--------------------------------------------------------------------------------------------------------------------------------------------------------------------------------------------------------------------------------------------------------------------------------------------------------------------------------------------------------------------------------------------------------------------------------------------------------------------------------------------------------------------------------------------------------------------------------------------------|
| Streptomycin   | 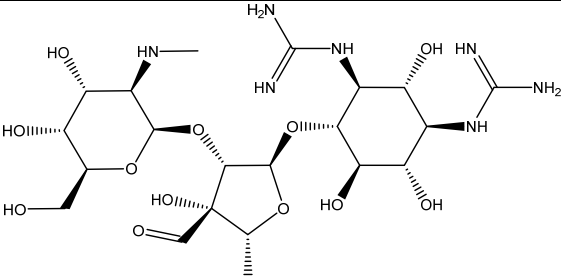<br>The chemical structure of Streptomycin consists of a streptidine ring system linked to a 2-deoxystreptose sugar, which is further linked to a 2,6-diaminocyclohexylmethyl sugar. The streptidine ring has two amino groups at the 2 and 6 positions. The 2-deoxystreptose sugar has a hydroxyl group at the 2 position and a methyl group at the 3 position. The 2,6-diaminocyclohexylmethyl sugar has amino groups at the 2 and 6 positions and a hydroxyl group at the 1 position.                       |
| Streptonicozid | <br>The chemical structure of Streptonicozid is a complex molecule featuring a streptidine ring system linked to a 2-deoxystreptose sugar, which is further linked to a 2,6-diaminocyclohexylmethyl sugar. The streptidine ring has two amino groups at the 2 and 6 positions. The 2-deoxystreptose sugar has a hydroxyl group at the 2 position and a methyl group at the 3 position. The 2,6-diaminocyclohexylmethyl sugar has amino groups at the 2 and 6 positions and a hydroxyl group at the 1 position. |
| Tobramycin     | <br>The chemical structure of Tobramycin is a complex molecule featuring a streptidine ring system linked to a 2-deoxystreptose sugar, which is further linked to a 2,6-diaminocyclohexylmethyl sugar. The streptidine ring has two amino groups at the 2 and 6 positions. The 2-deoxystreptose sugar has a hydroxyl group at the 2 position and a methyl group at the 3 position. The 2,6-diaminocyclohexylmethyl sugar has amino groups at the 2 and 6 positions and a hydroxyl group at the 1 position.    |
| Tubercidin     | <br>The chemical structure of Tubercidin is a complex molecule featuring a streptidine ring system linked to a 2-deoxystreptose sugar, which is further linked to a 2,6-diaminocyclohexylmethyl sugar. The streptidine ring has two amino groups at the 2 and 6 positions. The 2-deoxystreptose sugar has a hydroxyl group at the 2 position and a methyl group at the 3 position. The 2,6-diaminocyclohexylmethyl sugar has amino groups at the 2 and 6 positions and a hydroxyl group at the 1 position.   |
| Tuberin        | <br>The chemical structure of Tuberin is a complex molecule featuring a streptidine ring system linked to a 2-deoxystreptose sugar, which is further linked to a 2,6-diaminocyclohexylmethyl sugar. The streptidine ring has two amino groups at the 2 and 6 positions. The 2-deoxystreptose sugar has a hydroxyl group at the 2 position and a methyl group at the 3 position. The 2,6-diaminocyclohexylmethyl sugar has amino groups at the 2 and 6 positions and a hydroxyl group at the 1 position.      |
| Verazide       | <br>The chemical structure of Verazide is a complex molecule featuring a streptidine ring system linked to a 2-deoxystreptose sugar, which is further linked to a 2,6-diaminocyclohexylmethyl sugar. The streptidine ring has two amino groups at the 2 and 6 positions. The 2-deoxystreptose sugar has a hydroxyl group at the 2 position and a methyl group at the 3 position. The 2,6-diaminocyclohexylmethyl sugar has amino groups at the 2 and 6 positions and a hydroxyl group at the 1 position.     |

Viomycin

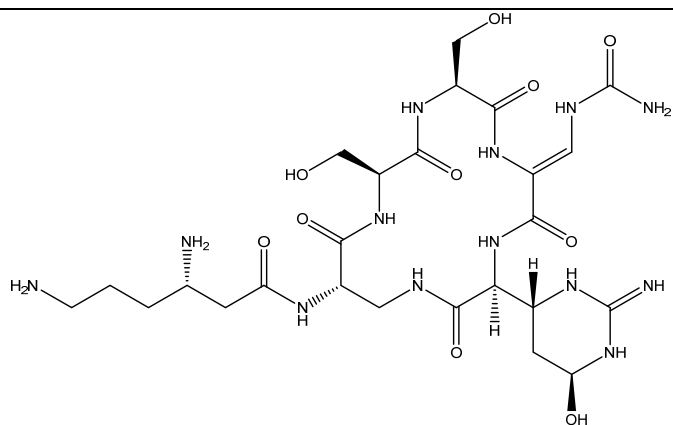

Supplement: s1 [file s1]
