# Supplementary material for: Similarity-Based Virtual Screening to Find Antituberculosis Agents Based on Novel Scaffolds: Design, Syntheses and Pharmacological Assays
Source: MDPI journal article supplement (doi:10.3390/ijms232315057), 2022-12-01
Supplement: s1 [file s1]

**Table S4.** Intercorrelations between the variables of DF for the group of active compounds.

|         | $J_1$      | $J_1^v$     | $J_3^v$    | $^1D$      | $^4C_c$     |
|---------|------------|-------------|------------|------------|-------------|
| $J_1$   | 1          | -0.3959151  | 0.19469083 | 0.12647627 | 0.06154102  |
| $J_1^v$ | -0.3959151 | 1           | 0.42390454 | 0.13859051 | -0.27254996 |
| $J_3^v$ | 0.19469083 | 0.42390454  | 1          | 0.36881239 | 0.09421997  |
| $^1D$   | 0.12647627 | 0.13859051  | 0.36881239 | 1          | 0.15407574  |
| $^4C_c$ | 0.06154102 | -0.27254996 | 0.09421997 | 0.15407574 | 1           |
