# Supplementary material for: Similarity-Based Virtual Screening to Find Antituberculosis Agents Based on Novel Scaffolds: Design, Syntheses and Pharmacological Assays
Source: MDPI journal article supplement (doi:10.3390/ijms232315057), 2022-12-01
Supplement: s1 [file s1]

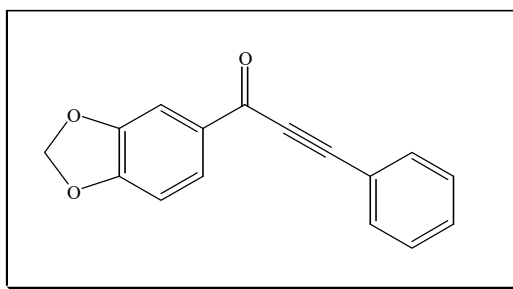

4a

IR (film)

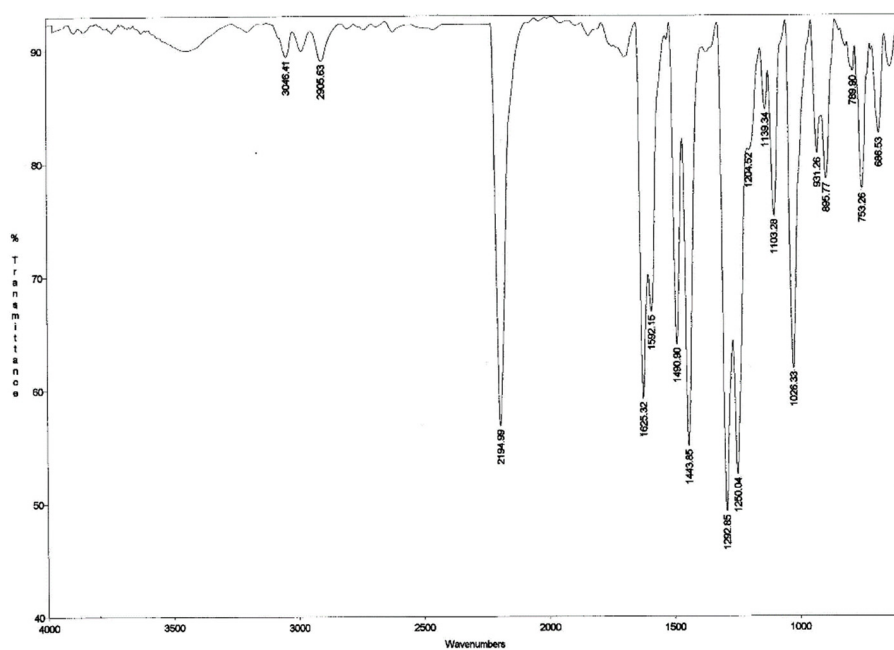

<sup>1</sup>H-RMN (200 MHz, CDCl<sub>3</sub>)

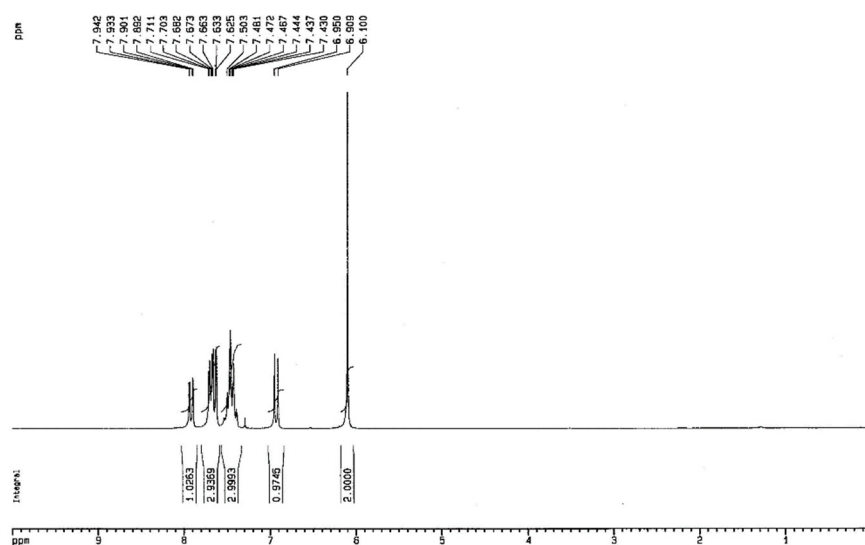

$^{13}\text{C}$ -RMN (50 MHz,  $\text{CDCl}_3$ )

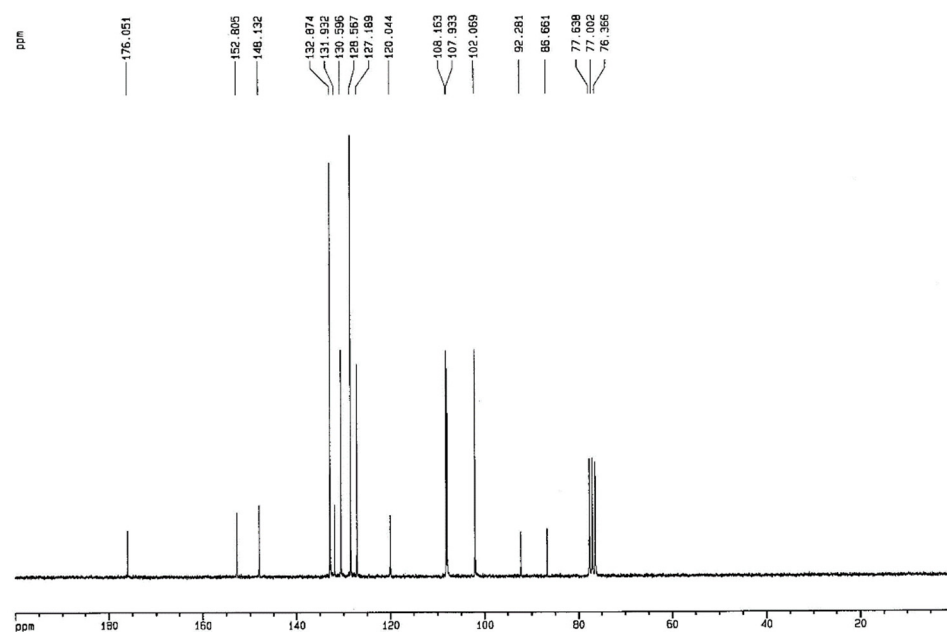

**Figure S1.** IR and NMR spectra of the compound **4a**.

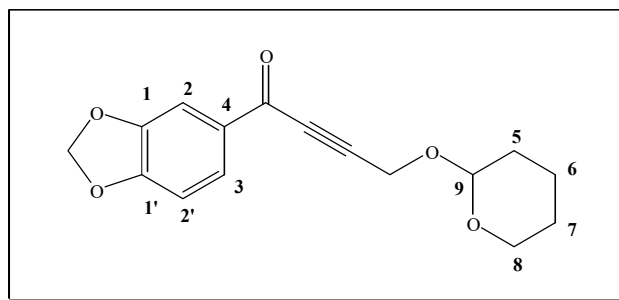

**4b**

IR (film)

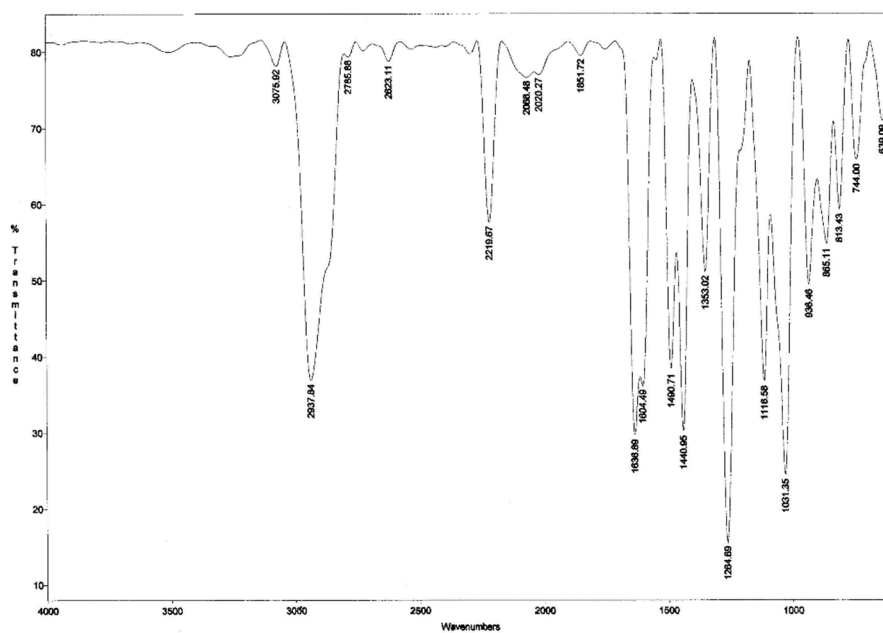

<sup>1</sup>H-RMN (200 MHz, CDCl<sub>3</sub>)

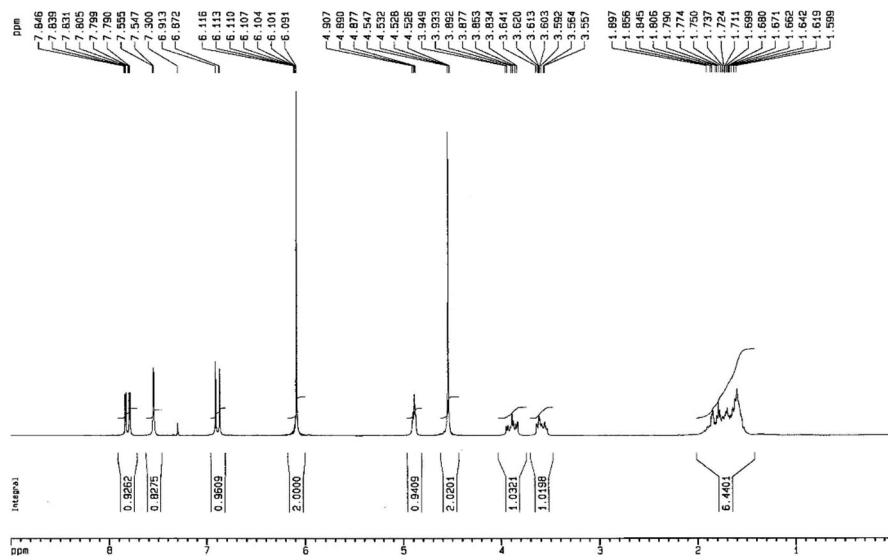

$^{13}\text{C}$ -RMN (50 MHz,  $\text{CDCl}_3$ )

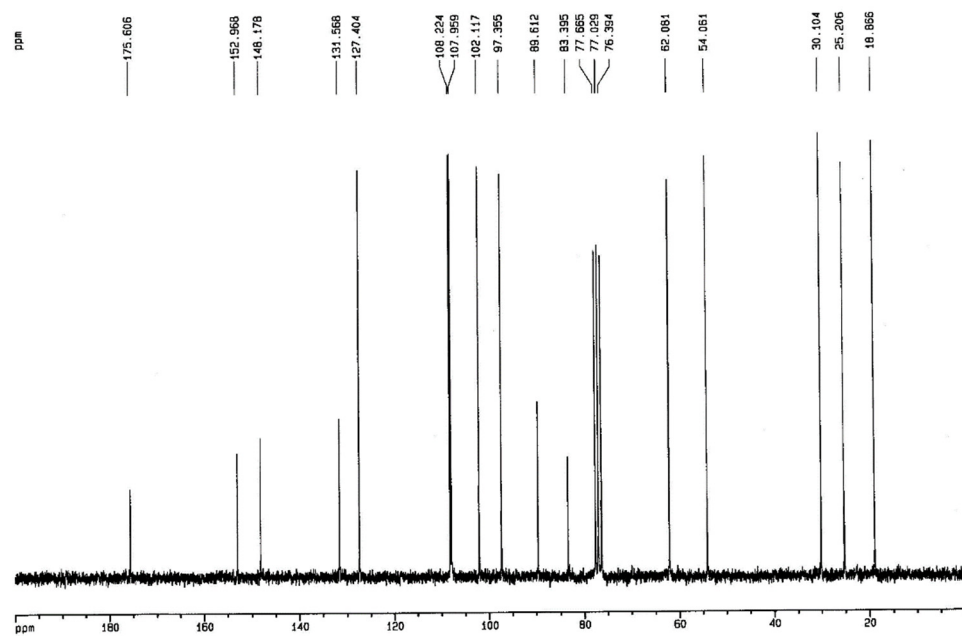

Figure S2. IR and NMR spectra of the compound 4b.

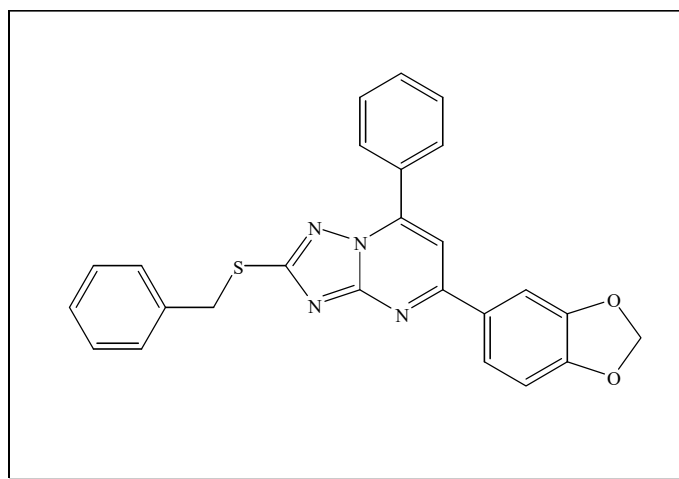

**6a**

IR (KBr)

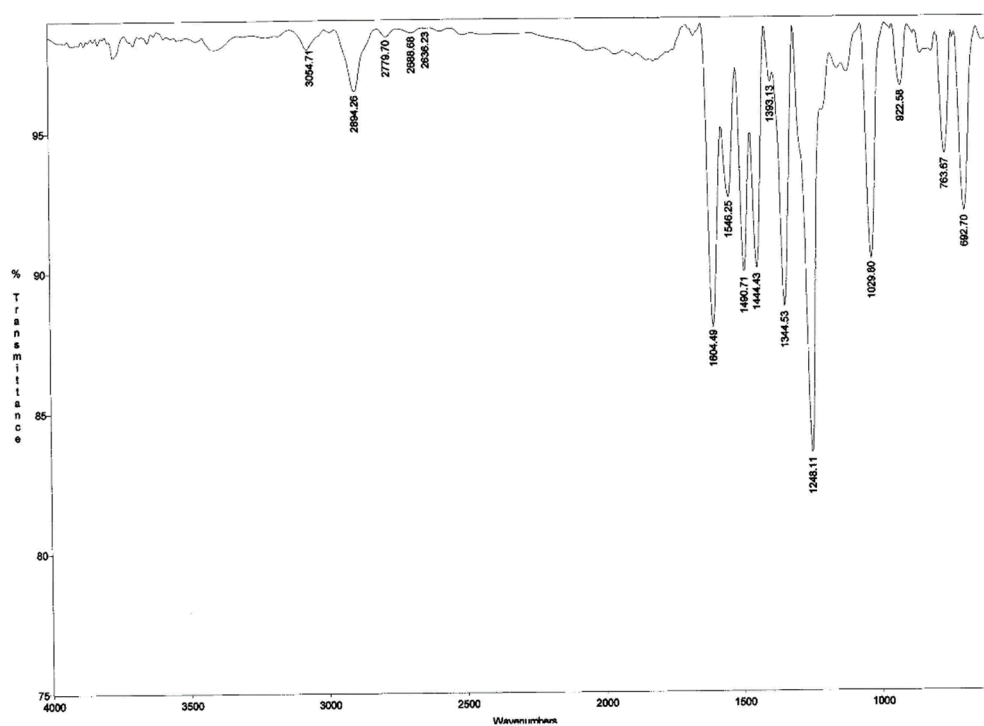

<sup>1</sup>H-RMN (200 MHz, DMSO-d6)

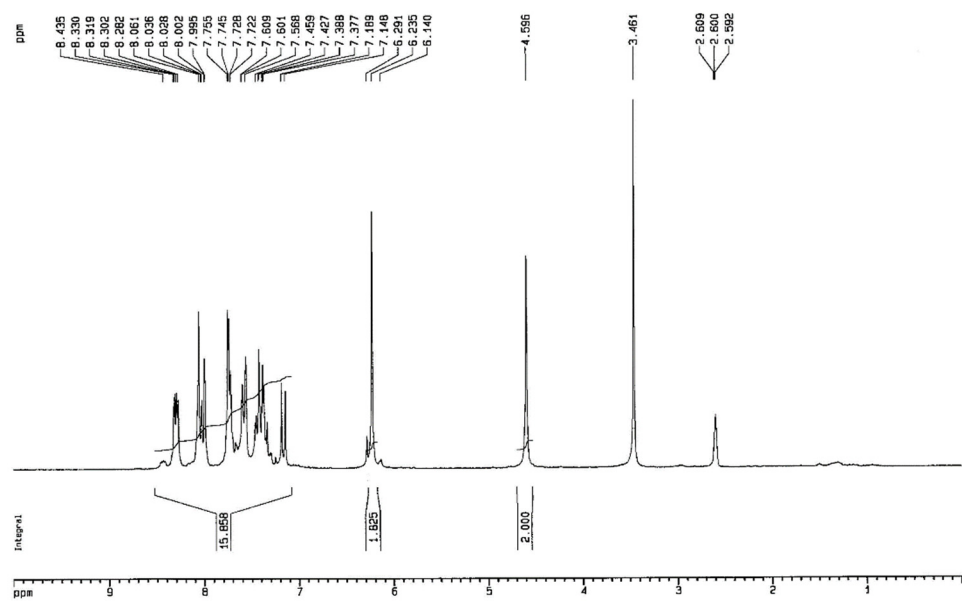

<sup>13</sup>C-RMN (50 MHz, DMSO-d<sub>6</sub>)

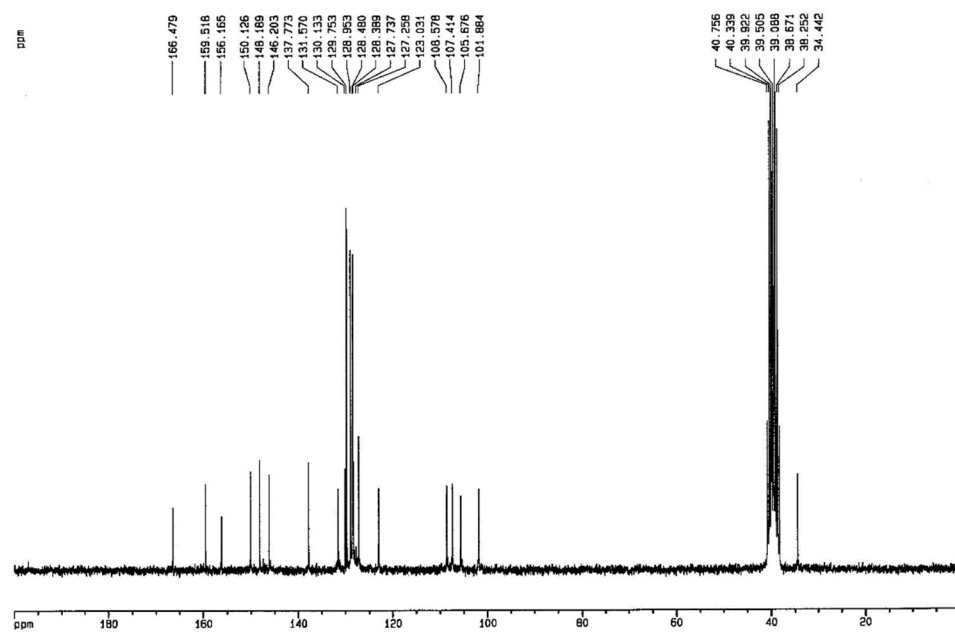

Figure S3. IR and NMR spectra of the compound 6a.
