# Supplementary material for: Similarity-Based Virtual Screening to Find Antituberculosis Agents Based on Novel Scaffolds: Design, Syntheses and Pharmacological Assays
Source: MDPI journal article supplement (doi:10.3390/ijms232315057), 2022-12-01
Supplement: s1 [file s1]

# Supporting Information

Table S3. Descriptors and discriminant function with their corresponding thresholds.

| Thresholds   |                                           |       |       | Thresholds   |                              |       |       |
|--------------|-------------------------------------------|-------|-------|--------------|------------------------------|-------|-------|
| Descriptor # | Parameter                                 | Lower | Upper | Descriptor # | Parameter                    | Lower | Upper |
| 1            | N                                         | 7     | 49    | 47           | <sup>0</sup> D               | 0.19  | 7.64  |
| 2            | V3                                        | 1     | 21    | 48           | <sup>1</sup> D               | 0.20  | 5.49  |
| 3            | V4                                        | 0     | 10    | 49           | <sup>2</sup> D               | 0.25  | 6.76  |
| 4            | R                                         | 1     | 18    | 50           | <sup>3</sup> D <sub>P</sub>  | 0.18  | 7.13  |
| 5            | W                                         | 45    | 8928  | 51           | <sup>3</sup> D <sub>C</sub>  | -0.01 | 1.83  |
| 6            | L                                         | 3     | 20    | 52           | <sup>4</sup> D <sub>P</sub>  | 0.14  | 6.32  |
| 7            | PR0                                       | 0     | 1     | 53           | <sup>4</sup> D <sub>C</sub>  | 0.00  | 0.22  |
| 8            | PR1                                       | 0     | 13    | 54           | <sup>4</sup> D <sub>PC</sub> | 0.09  | 5.65  |
| 9            | PR2                                       | 0     | 17    | 55           | E <sub>1</sub>               | 2.91  | 40.77 |
| 10           | PR3                                       | 0     | 15    | 56           | E <sub>2</sub>               | -4.52 | 9.16  |
| 11           | <sup>0</sup> X                            | 4.70  | 33.67 | 57           | E <sub>3</sub>               | -1.02 | 4.54  |
| 12           | <sup>1</sup> X                            | 2.41  | 20.36 | 58           | E <sub>4</sub>               | -0.93 | 2.36  |
| 13           | <sup>2</sup> X                            | 1.48  | 18.41 | 59           | E <sub>5</sub>               | -0.37 | 1.19  |
| 14           | <sup>3</sup> X <sub>P</sub>               | 0.85  | 15.71 | 60           | F <sub>1</sub>               | 0.26  | 1.42  |
| 15           | <sup>3</sup> X <sub>C</sub>               | 0.18  | 3.61  | 61           | F <sub>2</sub>               | -0.16 | 0.33  |
| 16           | <sup>4</sup> X <sub>P</sub>               | 0.27  | 12.25 | 62           | F <sub>3</sub>               | -0.10 | 0.10  |
| 17           | <sup>4</sup> X <sub>C</sub>               | 0.00  | 0.25  | 63           | F <sub>4</sub>               | -0.05 | 0.05  |
| 18           | <sup>4</sup> X <sub>PC</sub>              | 0.27  | 9.52  | 64           | F <sub>5</sub>               | -0.03 | 0.03  |
| 19           | <sup>0</sup> X <sup>V</sup>               | 3.64  | 26.02 | 65           | <sup>0</sup> C               | 1.01  | 1.34  |
| 20           | <sup>1</sup> X <sup>V</sup>               | 1.67  | 14.87 | 66           | <sup>1</sup> C               | 1.04  | 1.51  |
| 21           | <sup>2</sup> X <sup>V</sup>               | 0.90  | 11.65 | 67           | <sup>2</sup> C               | 1.08  | 1.77  |
| 22           | <sup>3</sup> X <sub>P</sub> <sup>V</sup>  | 0.40  | 8.58  | 68           | <sup>3</sup> C <sub>P</sub>  | 1.10  | 2.37  |
| 23           | <sup>3</sup> X <sub>C</sub> <sup>V</sup>  | 0.07  | 1.81  | 69           | <sup>3</sup> C <sub>C</sub>  | 0.98  | 2.87  |
| 24           | <sup>4</sup> X <sub>P</sub> <sup>V</sup>  | 0.12  | 5.92  | 70           | <sup>4</sup> C <sub>P</sub>  | 1.15  | 3.07  |
| 25           | <sup>4</sup> X <sub>C</sub> <sup>V</sup>  | 0.00  | 0.05  | 71           | <sup>4</sup> C <sub>C</sub>  | 0.00  | 9.13  |
| 26           | <sup>4</sup> X <sub>PC</sub> <sup>V</sup> | 0.08  | 3.87  | 72           | <sup>4</sup> C <sub>PC</sub> | 1.17  | 3.41  |
| 27           | G <sub>1</sub>                            | 1.75  | 17.25 | 73           | <sup>0</sup> Q               | 0.75  | 0.99  |
| 28           | G <sub>2</sub>                            | 1.11  | 22.56 | 74           | <sup>1</sup> Q               | 0.66  | 0.96  |
| 29           | G <sub>3</sub>                            | 0.63  | 6.75  | 75           | <sup>2</sup> Q               | 0.56  | 0.92  |
| 30           | G <sub>4</sub>                            | 0.00  | 4.73  | 76           | <sup>3</sup> Q <sub>P</sub>  | 0.42  | 0.91  |
| 31           | G <sub>5</sub>                            | 0.00  | 2.96  | 77           | <sup>3</sup> Q <sub>C</sub>  | 0.35  | 1.02  |
| 32           | G <sub>1</sub> <sup>V</sup>               | 6.03  | 56.03 | 78           | <sup>4</sup> Q <sub>P</sub>  | 0.33  | 0.87  |
| 33           | G <sub>2</sub> <sup>V</sup>               | 4.20  | 31.72 | 79           | <sup>4</sup> Q <sub>C</sub>  | 0.00  | 0.45  |
| 34           | G <sub>3</sub> <sup>V</sup>               | 0.86  | 10.90 | 80           | <sup>4</sup> Q <sub>PC</sub> | 0.29  | 0.85  |
| 35           | G <sub>4</sub> <sup>V</sup>               | 0.00  | 6.41  | 81           | CG <sub>1</sub>              | 0.10  | 0.56  |
| 36           | G <sub>5</sub> <sup>V</sup>               | 0.00  | 4.05  | 82           | CG <sub>2</sub>              | 0.26  | 1.62  |
| 37           | J <sub>1</sub>                            | 0.15  | 0.42  | 83           | CG <sub>3</sub>              | 0.46  | 2.18  |
| 38           | J <sub>2</sub>                            | 0.09  | 0.68  | 84           | CG <sub>4</sub>              | 0.00  | 1.71  |
| 39           | J <sub>3</sub>                            | 0.05  | 0.20  | 85           | CG <sub>5</sub>              | 0.00  | 5.86  |
| 40           | J <sub>4</sub>                            | 0.00  | 0.13  | 86           | QG <sub>1</sub>              | 1.77  | 10.49 |
| 41           | J <sub>5</sub>                            | 0.00  | 0.06  | 87           | QG <sub>2</sub>              | 0.62  | 3.78  |
| 42           | J <sub>1</sub> <sup>V</sup>               | 0.57  | 1.57  | 88           | QG <sub>3</sub>              | 0.46  | 2.19  |
| 43           | J <sub>2</sub> <sup>V</sup>               | 0.19  | 0.90  | 89           | QG <sub>4</sub>              | 0.00  | 2.94  |
| 44           | J <sub>3</sub> <sup>V</sup>               | 0.09  | 0.24  | 90           | QG <sub>5</sub>              | 0.00  | 4.34  |
| 45           | J <sub>4</sub> <sup>V</sup>               | 0.00  | 0.15  | -            | DF                           | 0.00  | 4.50  |
| 46           | J <sub>5</sub> <sup>V</sup>               | 0.00  | 0.09  |              |                              |       |       |
