# Supplementary material for: Similarity-Based Virtual Screening to Find Antituberculosis Agents Based on Novel Scaffolds: Design, Syntheses and Pharmacological Assays
Source: MDPI journal article supplement (doi:10.3390/ijms232315057), 2022-12-01
Supplement: s1 [file s1]

**Table S2.** Structures of the 45 compounds in the group of inactive substances.

| Name       | Structure                                                                            |
|------------|--------------------------------------------------------------------------------------|
| Acifran    | 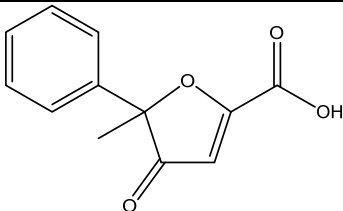   |
| Acipimox   |    |
| Acronine   |    |
| Aldicarb   |   |
| Allicin    |  |
| Alpidem    |  |
| Alprazolam |  |

|                |                                                                                      |
|----------------|--------------------------------------------------------------------------------------|
| Altretamine    | 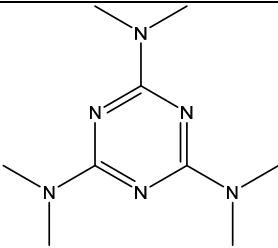   |
| Aminopromazine |    |
| Aminothiazole  |    |
| Amitraz        |    |
| Amsacrine      |   |
| Antipyrine     |  |
| Antrafenine    |  |

|              |                                                                                      |
|--------------|--------------------------------------------------------------------------------------|
| Azacosterol  | 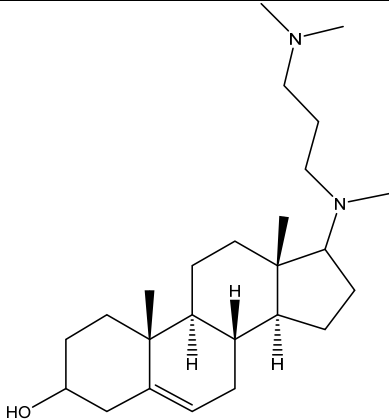   |
| Azapicyl     |    |
| Azaserine    |    |
| Beclobrate   |   |
| Benorylate   |  |
| Benzoctamine |  |
| Benzoic Acid |  |

|                |                                                                                      |
|----------------|--------------------------------------------------------------------------------------|
| Bixin          | 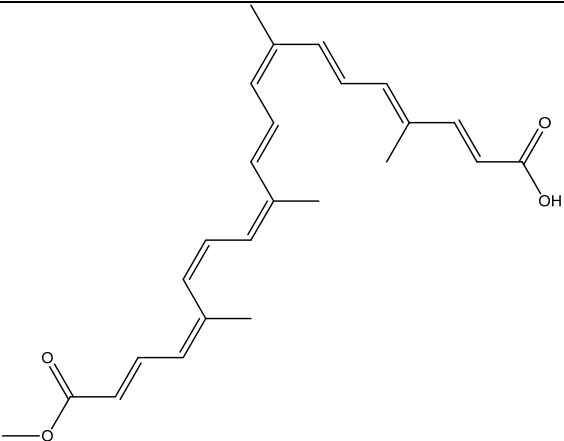   |
| Brilliant Blue |    |
| Bromazepam     |   |
| Buspirone      |  |
| Butibufen      |  |
| Camazepam      |  |

|               |                                                                                      |
|---------------|--------------------------------------------------------------------------------------|
| Canthaxanthin | 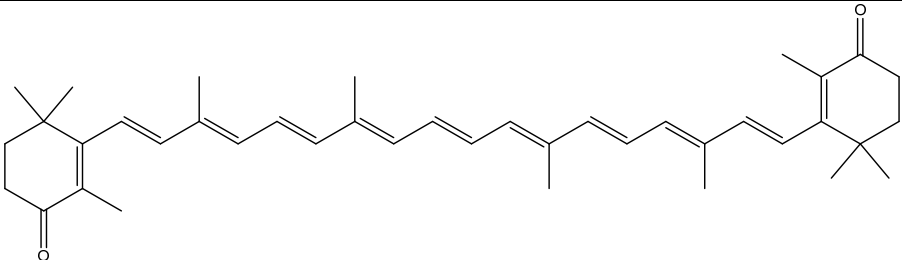   |
| Captodiamine  |    |
| Carmofur      |    |
| Carmustine    |   |
| Carnitine     |  |
| Carprofen     |  |
| Chloropal     |  |
| Clofibrate    |  |

|             |                                                                                      |
|-------------|--------------------------------------------------------------------------------------|
| Dichlone    | 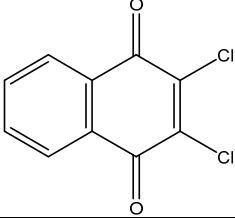   |
| Etifoxin    |    |
| Feprazone   |   |
| Genite      |  |
| Glucosamine |  |
| Ornithine   |  |
| Paraoxon    |  |

|             |                                                                                                                                                            |
|-------------|------------------------------------------------------------------------------------------------------------------------------------------------------------|
| Piroxicam   | 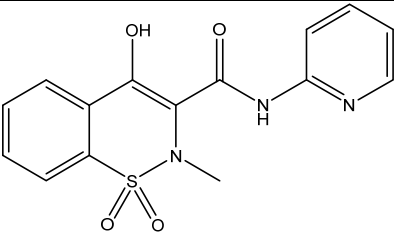 <chem>CN1C(=C(C(=C2C=CC=CC=C2S1(=O)=O)O)C(=O)NC3=CC=CC=N3)</chem>       |
| Prazepam    |  <chem>Clc1ccc2c(c1)nc(ccn2C3=CC=CC=C3)C(=O)N2CC3CC3C2</chem>            |
| Theofibrate |  <chem>CN1C=NC2=C1C(=O)N(C)C(=O)N2CCCOCC(=O)C(C)(C)Oc3ccc(Cl)cc3</chem> |
